# Supplementary material for: Estimation of seasonal methane fluxes over a Mediterranean rice paddy area using the Radon Tracer Method (RTM)
Source: Copernicus journal article supplement (doi:10.5194/egusphere-2024-1370), 2024-06-03
Supplement: Supplementary file 1 [file egusphere-2024-1370-supplement.pdf]

# Supplementary to Estimation of seasonal methane fluxes over a Mediterranean rice paddy area using the Radon Tracer Method (RTM)

5

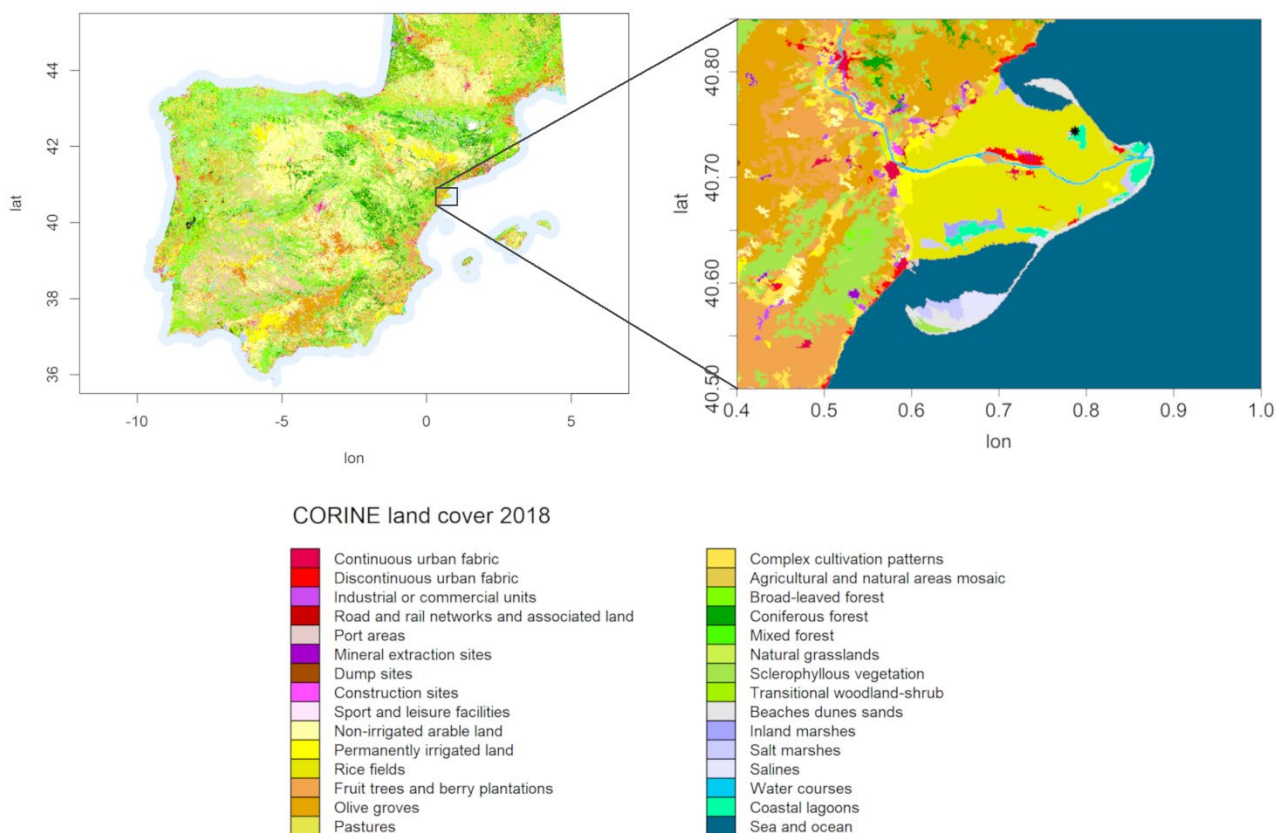

10 **Figure S1. CORINE land cover map 2018 for the Iberian Peninsula with a zoom, on the right side, over the Ebro River Delta (European Union, 2018). DEC station is marked with a black asterisk.**

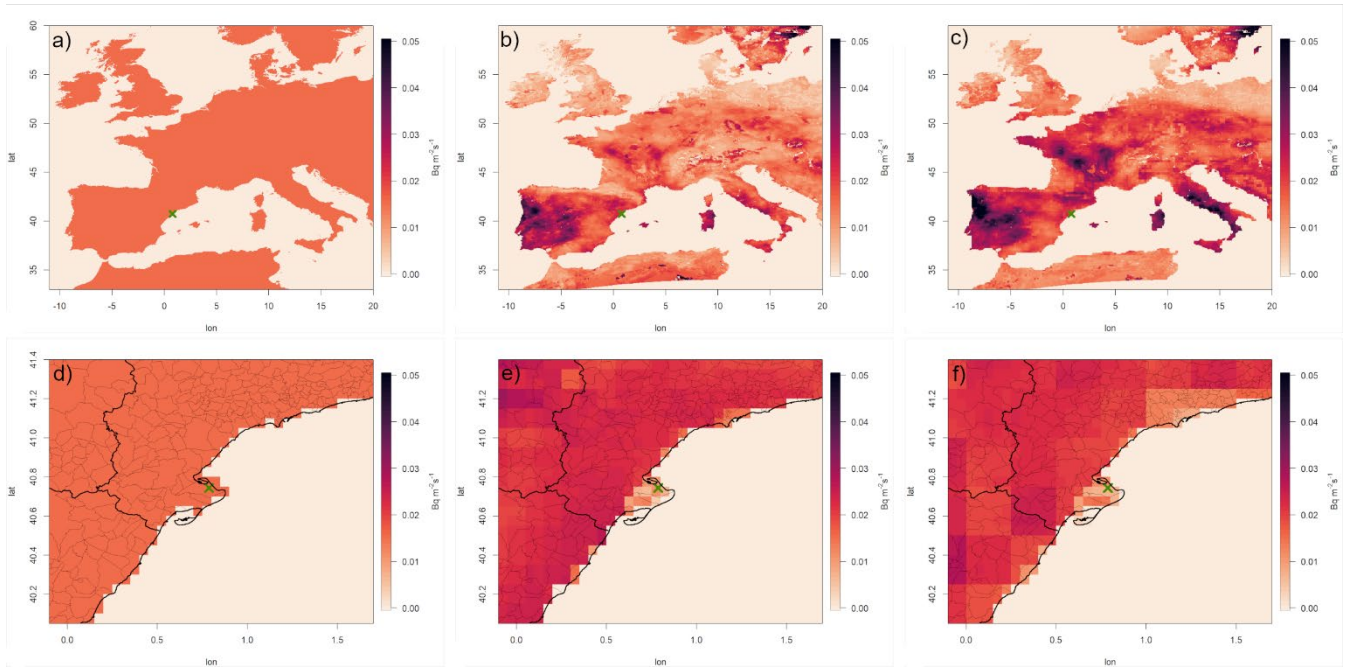

15

**Figure S2. Average 2013-2019  $^{222}\text{Rn}$  exhalation maps: a) Constant value of  $15.8 \text{ mBq m}^{-2} \text{ s}^{-1}$  over land; b) ERA5-Land radon exhalation map; c) GLDAS-Noah radon exhalation map; c, d and e, same as a, b and c for the  $70 \text{ km} \times 70 \text{ km}$  window around DEC station (green cross).**

20

25

30

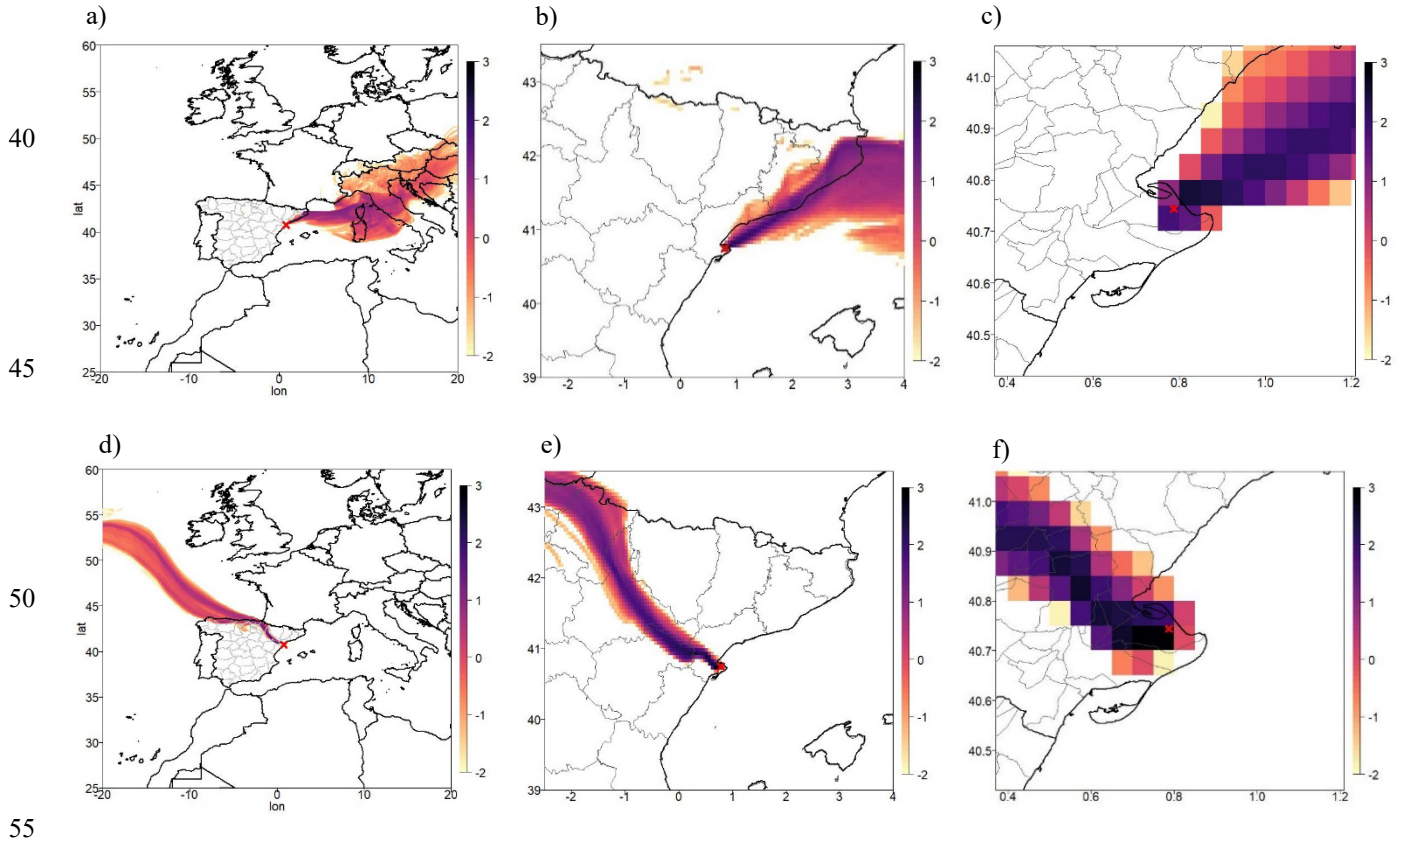

**Figure S3. Modelled back trajectories (between 0 - 200 m a.g.l.) from DEC with Flex-WRF for two different synoptic situations: day 19/04/2019 at 00h UTC (a, b and c panels) and day 20/05/2019 at 00h UTC (d, e and f panels). Colours represent de logarithm of the residence time (seconds) in every  $0.05^\circ \times 0.05^\circ$  grid cell.**

a)

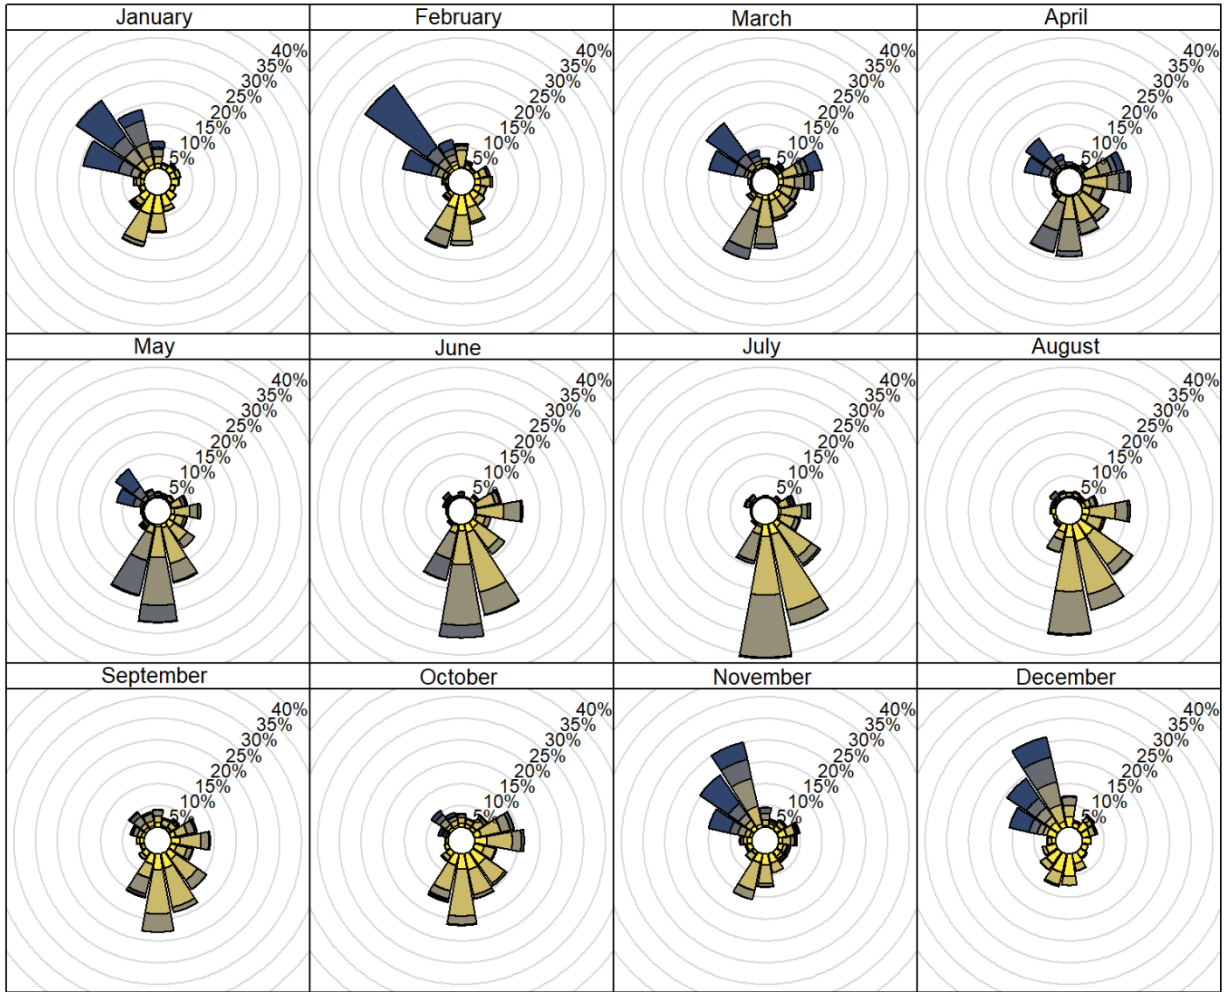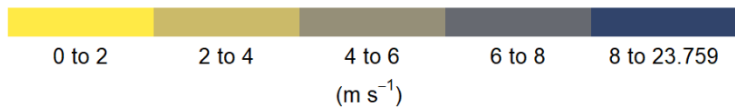

b)

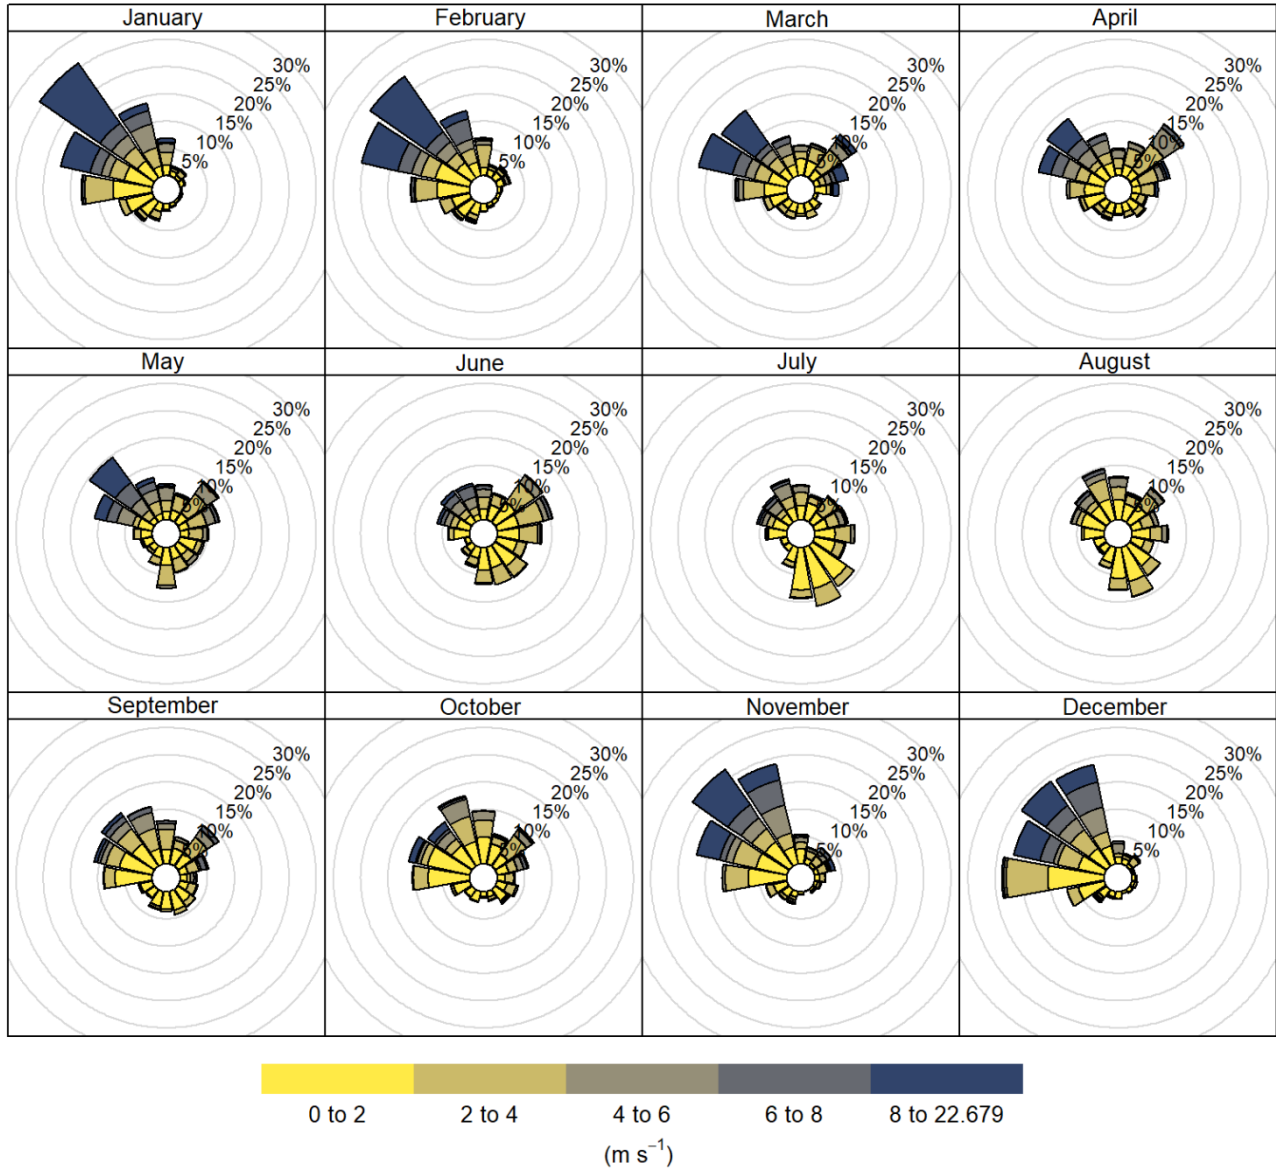

65

Figure S4. Wind roses for air coming at DEC station (10 m a.g.l.) for: a) midday hours (11h UTC to 17h UTC); b) nocturnal hours (RTM window, 21h UTC to 03h UTC).

70

**Table S1. Simulation of radon concentrations at DEC station: models' performance measures across different time periods based on the comparison of models' predictions vs. observed values.**

| Period                        | Statistics                  | Flex-WRF-ERA5<br>vs. Observations | Flex-WRF-GLDAS<br>vs. Observations | Flex-WRF-Const*<br>vs. Observations |
|-------------------------------|-----------------------------|-----------------------------------|------------------------------------|-------------------------------------|
| March - April<br>2019         | Bias (Bq m <sup>-3</sup> )  | -0.38                             | 0.084                              | -0.43                               |
|                               | R (-)                       | 0.21                              | 0.18                               | 0.24                                |
|                               | RMSE (Bq m <sup>-3</sup> )  | 1.57                              | 1.63                               | 1.47                                |
|                               | WRMSE (Bq m <sup>-3</sup> ) | 0.61                              | 0.58                               | 0.54                                |
| May 2019                      | Bias (Bq m <sup>-3</sup> )  | 0.33                              | 0.54                               | 0.21                                |
|                               | R (-)                       | 0.54                              | 0.54                               | 0.52                                |
|                               | RMSE (Bq m <sup>-3</sup> )  | 0.87                              | 1.03                               | 0.76                                |
|                               | WRMSE (Bq m <sup>-3</sup> ) | 0.48                              | 0.52                               | 0.45                                |
| July - August<br>2019         | Bias (Bq m <sup>-3</sup> )  | -0.05                             | 0.22                               | -0.82                               |
|                               | R (-)                       | 0.51                              | 0.53                               | 0.58                                |
|                               | RMSE (Bq m <sup>-3</sup> )  | 1.33                              | 1.47                               | 1.28                                |
|                               | WRMSE (Bq m <sup>-3</sup> ) | 1.62                              | 1.65                               | 0.7                                 |
| October -<br>November<br>2019 | Bias (Bq m <sup>-3</sup> )  | -0.52                             | -0.23                              | -0.92                               |
|                               | R (-)                       | 0.46                              | 0.38                               | 0.33                                |
|                               | RMSE (Bq m <sup>-3</sup> )  | 1.94                              | 1.97                               | 2.13                                |
|                               | WRMSE (Bq m <sup>-3</sup> ) | 0.61                              | 0.62                               | 0.63                                |

\*Constant value of 15.8 mBq m<sup>-3</sup> s<sup>-1</sup> on land pixels and 0 mBq m<sup>-3</sup> s<sup>-1</sup> on sea pixels.

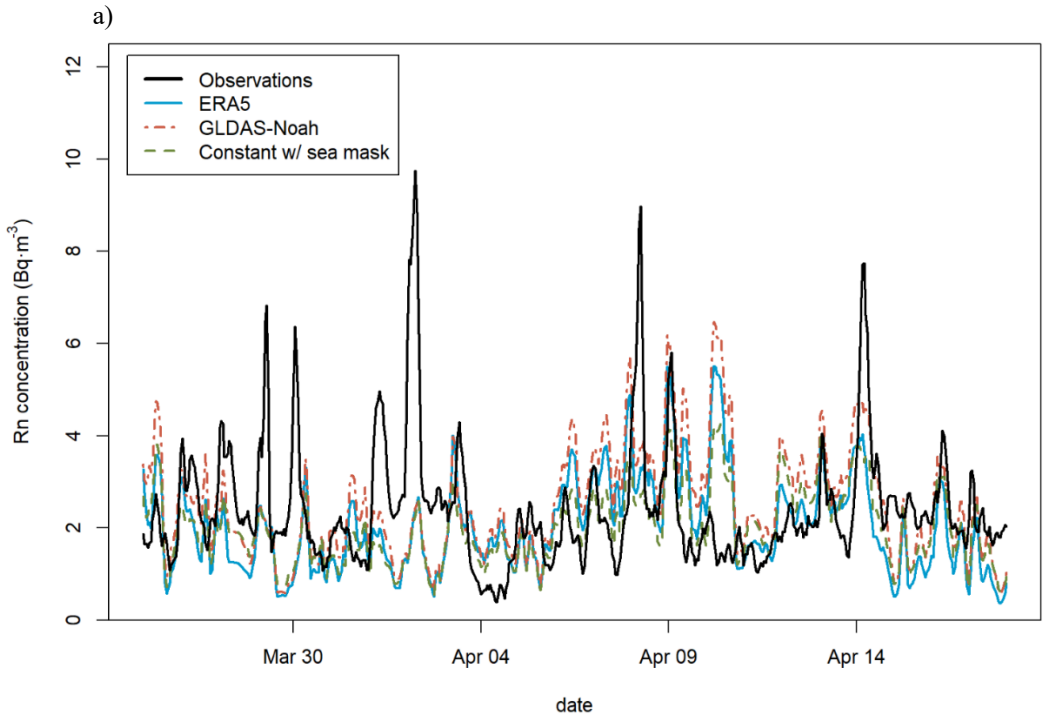

75

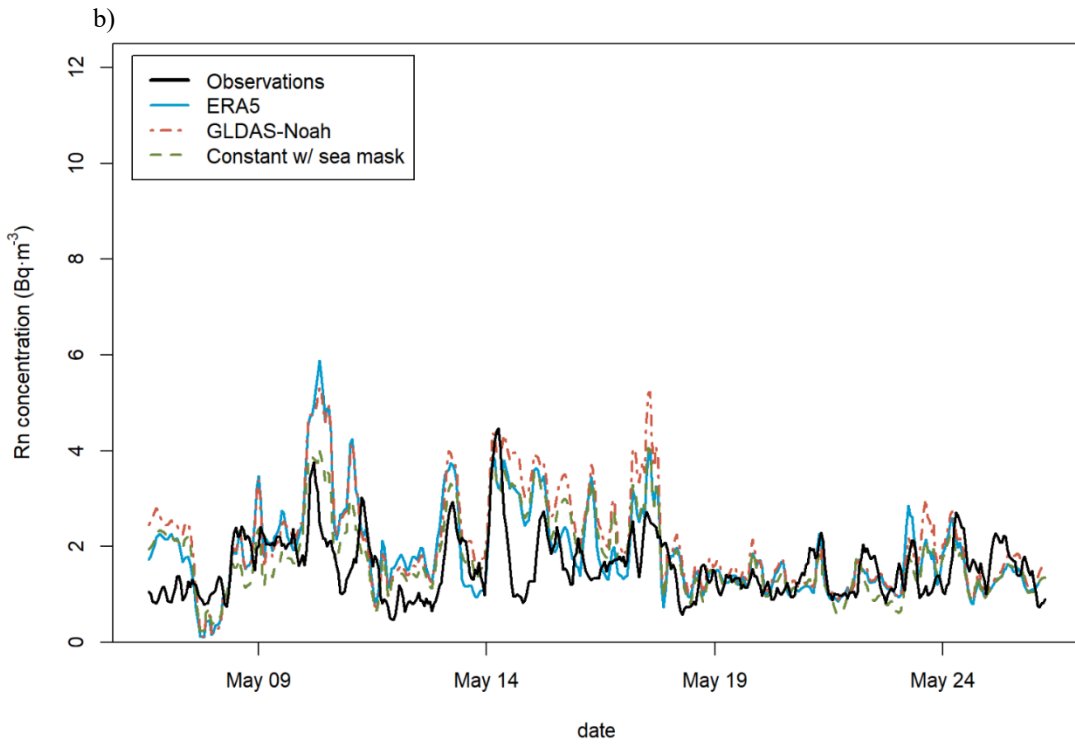



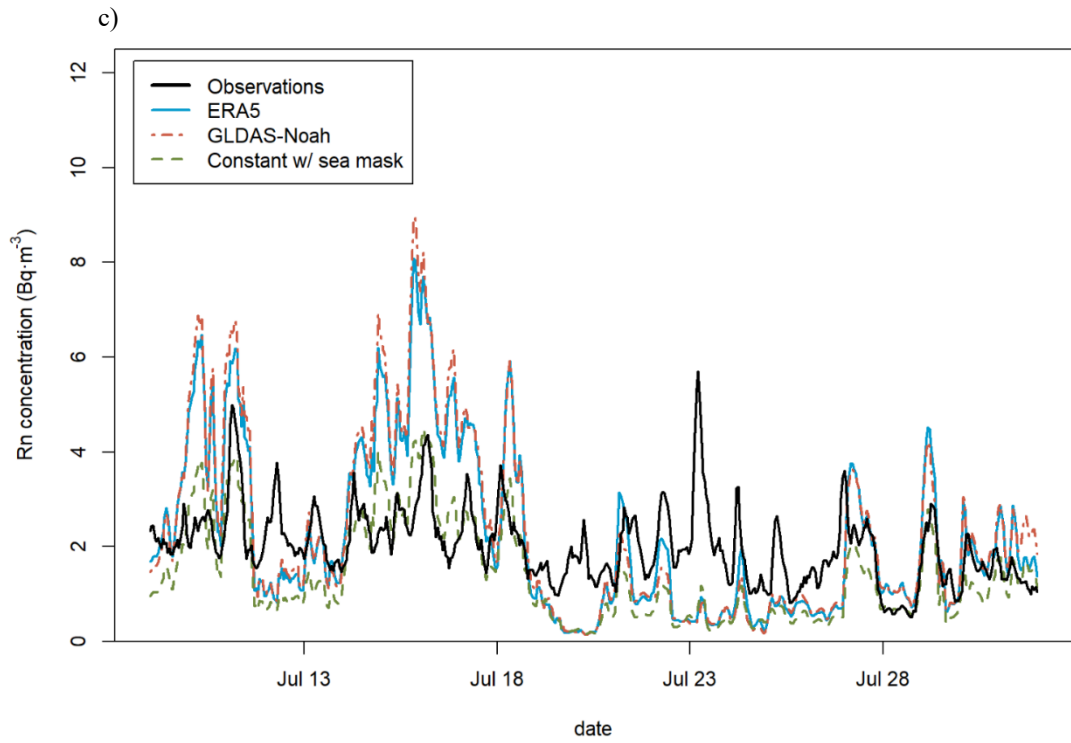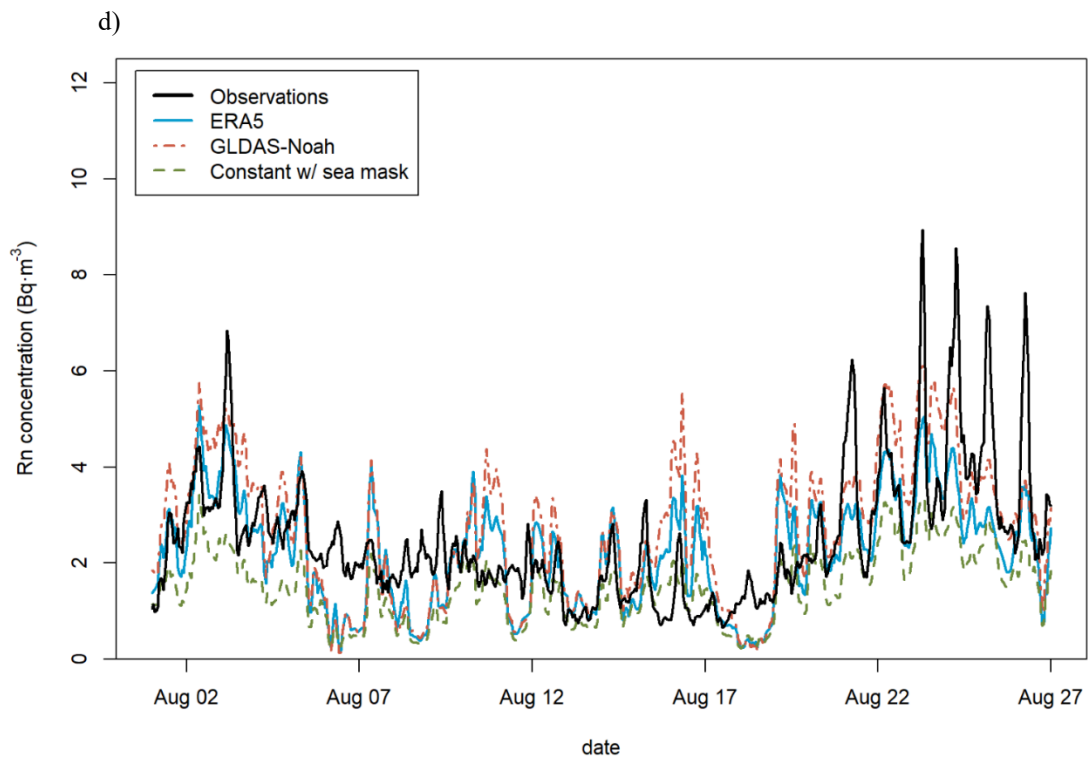



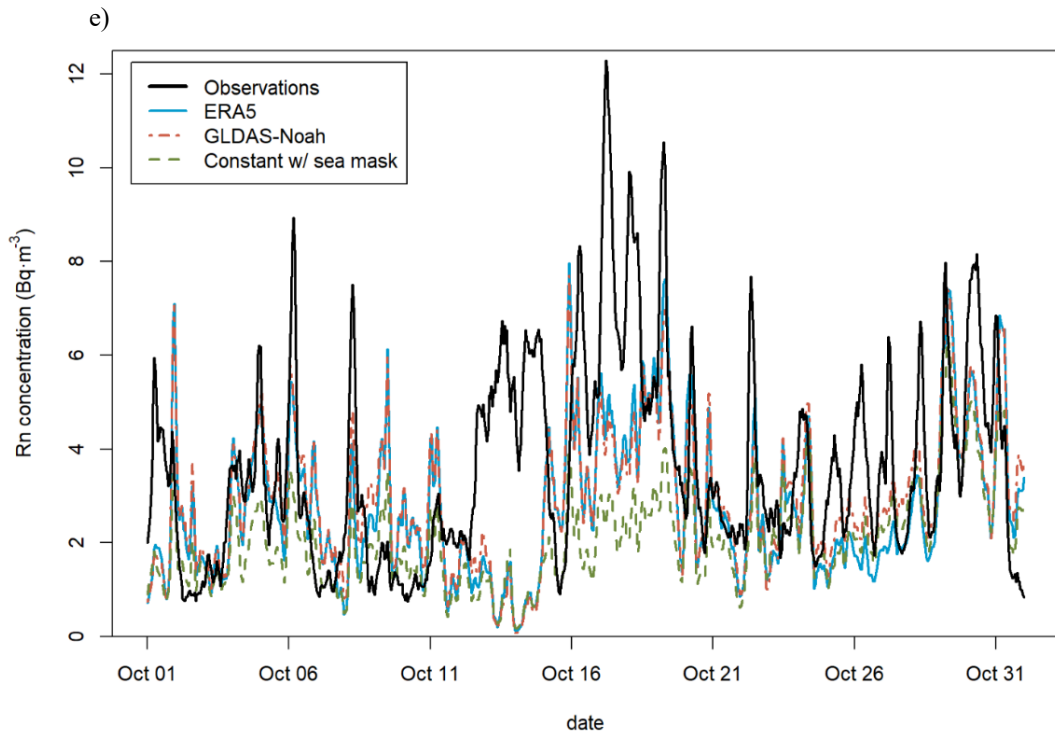

80

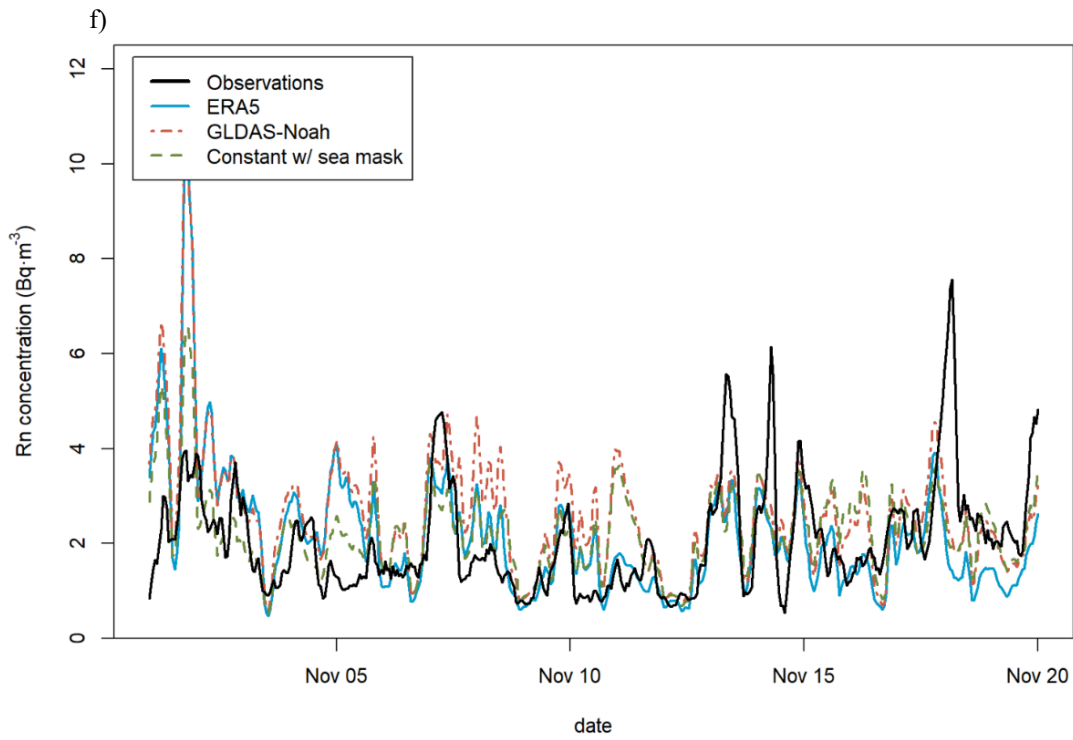

85 **Figure S5. Measured (black) and simulated radon atmospheric concentrations at DEC using ERA5 radon exhalation maps (solid blue), GLDAS radon exhalation maps (dash-dotted red line) and a constant radon exhalation value with a land-sea mask (dashed green line) for different periods: a) March-April 2019, b) May 2019, c) July 2019, d) August 2019, e) October 2019, and f) November 2019.**
